# Supplementary material
Source: PubMed Central journal article supplement (PMC9458621)
Supplement: NIHMS1823439-supplement-Ref__permission_not_needed.pdf [file NIHMS1823439-supplement-Ref__permission_not_needed.pdf]

**From:** Jennifer Pluznick  
**To:** [Hypertension](#)  
**Cc:** [Jiaojiao Xu](#); [Brittni N Moore](#)  
**Subject:** RE: HYPE/2021/18558R2: Request Final Files - style issues  
**Date:** Friday, July 8, 2022 4:38:22 PM

---

**\*\*\* CAUTION:** This email originated from outside of the **American Heart Association**. Do **not** click links or open attachments unless you recognize the sender and know the content is safe. \*\*\*

Hello,

Thank you again for working with us on this. We will soon upload the required files. Meanwhile, I wanted to respond to your inquiry, "Legend of figures 1 and 2 refer to references 134, 103, 108, 39 and 49 in the text of the manuscript. Please provide permission to reprint or include a statement that permission is not necessary (and why) by email."

Permission is not necessary for either of these figures. Figure 1 is data from the human protein atlas. They give clear citation guidelines here (<https://www.proteinatlas.org/about/licence>) which we have followed.

Figure 2 is a summary of the literature. This is a review article, so it is expected that we summarize the literature. The references given are for the data and studies that support the diagram that we have made. However, we are not showing any data from those papers but rather are summarizing the literature in a graphical format (again, this is a review article so this is expected). We have included the references to make it easier for the reader to find the studies that support this summary.

Best  
Jen

---

**From:** hypertension@heart.org <hypertension@heart.org>  
**Sent:** Thursday, July 07, 2022 11:37 AM  
**To:** Jennifer Pluznick <jpluznick@jhmi.edu>  
**Subject:** HYPE/2021/18558R2: Request Final Files - style issues

**External Email - Use Caution**

PLEASE READ: During this unprecedented and challenging time, the health and safety of you, your family, and your community is of utmost importance. We appreciate that one aspect of this current situation is the inability to continue research work and that some measures will lead to a significant hindering of research progress. Please know that we are flexible regarding turnaround times for

revisions and other tasks during this stressful time and deadlines will be extended as needed. If you are able to, please contact us if you need any extensions or if you experience any challenges around manuscript preparation; we will work with you.

07-Jul-2022

Dr. Jennifer L. Pluznick  
Johns Hopkins University School of Medicine  
Department of Physiology  
725 N. Wolfe Street  
Baltimore, Maryland 21205

MS ID#: HYPE/2021/18558R2

MS TITLE: Short Chain Fatty Acid Receptors and Blood Pressure Regulation

Dear Dr. Pluznick:

I am pleased to inform you that your Invited Review is potentially acceptable for publication in Hypertension providing the items below are addressed. Please note that we cannot send your manuscript to production until the items below are addressed completely and in full.

**ACCESS LICENSE RESPONSE REQUIRED:** You previously selected that the Open Access Agreement Non-Commercial and No Modifications or Adaptations (CC-BY-NC-ND) authorship forms cover the access licensing REQUIREMENTS OF YOUR FUNDERS for ALL AUTHORS related to this manuscript. Examples include, RUCK, Wellcome Trust, British Heart Foundation, Gates Foundation etc. It is NOT acceptable to change your licensing preference after your manuscript has been accepted, nor after it has gone to production. **Therefore, please respond in email reply, "I confirm selection of Open Access Agreement Non-Commercial and No Modifications or Adaptations (CC-BY-NC-ND) MEETS THE NEEDS OF THE FUNDERS OF EVERY AUTHOR and accept responsibility for all costs associated with this choice."**

**PUBLICATION FEES RESPONSE REQUIRED:** Publication fees will apply to your manuscript. All information regarding publication fees can be accessed at <https://www.ahajournals.org/hyp/revise-accepted-manuscripts>. **After doing so, please also respond in email reply, "I confirm that I have read and am fully aware of the costs associated with publishing my manuscript."**

- On the Title Page, supply a SHORT TITLE of no more than 50 characters.

- Supply 5 to 7 Keywords below the Abstract.

- Figures - provide them as TIFF or EPS instead of a pptx files. The resolution has to be 300 dpi. Remove the figure legends at the bottom of your figures.

- The font size of the manuscript, reference section and figure legends has to be 12 instead of 11 pt.

- Legend of figures 1 and 2 refer to references 134, 103, 108, 39 and 49 in the text of the manuscript. Please provide permission to reprint or include a statement that permission is not necessary (and why) by email.
- Rename Acknowledgements by Sources of Funding.
- Place figure legends after the reference section.
- Place Sources of Funding and Disclosures before the reference section.

Authorship changes are not allowed post acceptance. If you make any changes in authorship of your manuscript (additions, deletions, change of order) prior to acceptance, you must complete a Change of Authorship Form and have all authors sign agreeing to the change. If your manuscript is accepted, it will not be possible to publish it until all signatures are in place. The form may be downloaded from [https://www.ahajournals.org/pb-assets/migration/COA\\_Form-1532532203410.pdf](https://www.ahajournals.org/pb-assets/migration/COA_Form-1532532203410.pdf).

The files are needed before your manuscript can enter the production cycle. When all listed items are complete please submit online at <https://hype-submit.aha-journals.org/cgi-bin/main.plex?el=A3Hm5DCZM4C2IyI5BS5A9ftd9dBdX3KKasfW1jZXMfEmAZ>.

Please contact our editorial office if you have questions about the items requested ( [hypertension@heart.org](mailto:hypertension@heart.org) ). We will not be able to submit your manuscript for publication until final materials are received in this editorial office. Also, the date your final materials are received will be published in Hypertension as the acceptance date for your manuscript.

Thanks again for submitting your interesting work to Hypertension. We look forward to receiving future manuscripts from you. With kind regards,

Sincerely,

Renata Gil  
Assistant Managing Editor  
Hypertension Editorial Office

=====

To submit, go to <https://hype-submit.aha-journals.org/cgi-bin/main.plex?el=A3Hm5DCZM4C2IyI5BS5A9ftd9dBdX3KKasfW1jZXMfEmAZ>
